# Supplementary material for: Effectiveness of linkage to care and prevention interventions following HIV self-testing: a global systematic review and meta-analysis protocol
Source: HighWire-hosted journal article supplement (doi:10.1136/bmjopen-2021-055688), 2022-09-01
Supplement: bmjopen-2021-055688supp001_data_supplement.pdf [file bmjopen-2021-055688supp001_data_supplement.pdf]

**Table S1: Search strategy for MEDLINE via OVID SP®**

| SN  | Search terms                                                                                                                                                                                                                                                                                                                                                                                                                                                                                                                                                                                                                                             |
|-----|----------------------------------------------------------------------------------------------------------------------------------------------------------------------------------------------------------------------------------------------------------------------------------------------------------------------------------------------------------------------------------------------------------------------------------------------------------------------------------------------------------------------------------------------------------------------------------------------------------------------------------------------------------|
| 1.  | exp HIV/                                                                                                                                                                                                                                                                                                                                                                                                                                                                                                                                                                                                                                                 |
| 2.  | HIV?1.mp.                                                                                                                                                                                                                                                                                                                                                                                                                                                                                                                                                                                                                                                |
| 3.  | Exp HIV?2.mp.                                                                                                                                                                                                                                                                                                                                                                                                                                                                                                                                                                                                                                            |
| 4.  | exp HIV infection\$/                                                                                                                                                                                                                                                                                                                                                                                                                                                                                                                                                                                                                                     |
| 5.  | human immun?deficiency virus.mp.                                                                                                                                                                                                                                                                                                                                                                                                                                                                                                                                                                                                                         |
| 6.  | exp Acquired Immunodeficiency Syndrome/ or AIDS.mp.                                                                                                                                                                                                                                                                                                                                                                                                                                                                                                                                                                                                      |
| 7.  | Or/1-6                                                                                                                                                                                                                                                                                                                                                                                                                                                                                                                                                                                                                                                   |
| 8.  | self?test\$.mp.                                                                                                                                                                                                                                                                                                                                                                                                                                                                                                                                                                                                                                          |
| 9.  | test\$ adj3 and (home* or remote or personal).mp.                                                                                                                                                                                                                                                                                                                                                                                                                                                                                                                                                                                                        |
| 10. | (option\$ adj1 test\$.mp.                                                                                                                                                                                                                                                                                                                                                                                                                                                                                                                                                                                                                                |
| 11. | (alternative adj3 test\$.mp.                                                                                                                                                                                                                                                                                                                                                                                                                                                                                                                                                                                                                             |
| 12. | (dried blood spot adj3 (home* or remote or personal or self*)),ti,ab.                                                                                                                                                                                                                                                                                                                                                                                                                                                                                                                                                                                    |
| 13. | ((home\$ or self\$ or mail\$) adj3 (collection\$ or sampl\$ or test\$ or kit\$)).ti,ab.                                                                                                                                                                                                                                                                                                                                                                                                                                                                                                                                                                  |
| 14. | Or/8-13                                                                                                                                                                                                                                                                                                                                                                                                                                                                                                                                                                                                                                                  |
| 15. | "Referral and Consultation"/                                                                                                                                                                                                                                                                                                                                                                                                                                                                                                                                                                                                                             |
| 16. | Health Services Accessibility/                                                                                                                                                                                                                                                                                                                                                                                                                                                                                                                                                                                                                           |
| 17. | ((continuity or quality or standard or link\$ or cascade) adj3 care)).mp.                                                                                                                                                                                                                                                                                                                                                                                                                                                                                                                                                                                |
| 18. | Or/15-17                                                                                                                                                                                                                                                                                                                                                                                                                                                                                                                                                                                                                                                 |
| 19. | exp clinical trial/ or (trial or randomized or randomised).ti. or randomly.ab. or randomi?ed.ab. or placebo.ab. or controlled clinical trial.pt.                                                                                                                                                                                                                                                                                                                                                                                                                                                                                                         |
| 20. | 7 and 14 and 18 and 19                                                                                                                                                                                                                                                                                                                                                                                                                                                                                                                                                                                                                                   |
| 21. | exp animals/ not humans.sh.                                                                                                                                                                                                                                                                                                                                                                                                                                                                                                                                                                                                                              |
| 22. | 20 not 21                                                                                                                                                                                                                                                                                                                                                                                                                                                                                                                                                                                                                                                |
| 23. | exp case reports/ or Cohort Studies/ or cohort\$.mp. or cross-sectional stud\$.mp. or cross?sectional stud\$.mp. or case-control stud\$.mp. or case control stud\$.mp.                                                                                                                                                                                                                                                                                                                                                                                                                                                                                   |
| 24. | 22 not 23                                                                                                                                                                                                                                                                                                                                                                                                                                                                                                                                                                                                                                                |
| 25. | (exp adolescence/ or exp adolescent/ or exp child/ or exp childhood disease/ or exp infant disease/ or (adolescen* or babies or baby or boy? or boyfriend or boyhood or child or child* or child*3 or children* or girl? or infant* or juvenil* or juvenile* or kid? or minors or minors* or neonat* or neonat* or newborn* or new-born* or paediatric* or peadiatric* or pediatric* or perinat* or preschool* or puber* or pubescen* or school or school child* or school* or schoolchild* or schoolchild* or teen* or toddler? or underage? or under-age? or youth*).ti,ab,kf,hw.) not ((exp child/ or exp infant/ or exp adolescent/) and exp adult/) |
| 26. | 24 not 25                                                                                                                                                                                                                                                                                                                                                                                                                                                                                                                                                                                                                                                |
| 27. | limit 26 to (english language or french language and yr="2010 -Current")                                                                                                                                                                                                                                                                                                                                                                                                                                                                                                                                                                                 |

**Table S2: Search strategy for EMBASE via OVID SP®**

| SN  | Search terms                                                                                                                                                                                                                                                                                                                                                                                                                                                                                                                                                                                                                                             |
|-----|----------------------------------------------------------------------------------------------------------------------------------------------------------------------------------------------------------------------------------------------------------------------------------------------------------------------------------------------------------------------------------------------------------------------------------------------------------------------------------------------------------------------------------------------------------------------------------------------------------------------------------------------------------|
| 1.  | exp HIV/                                                                                                                                                                                                                                                                                                                                                                                                                                                                                                                                                                                                                                                 |
| 2.  | HIV?1.mp.                                                                                                                                                                                                                                                                                                                                                                                                                                                                                                                                                                                                                                                |
| 3.  | Exp HIV?2.mp.                                                                                                                                                                                                                                                                                                                                                                                                                                                                                                                                                                                                                                            |
| 4.  | exp HIV infection\$/                                                                                                                                                                                                                                                                                                                                                                                                                                                                                                                                                                                                                                     |
| 5.  | human immun?deficiency virus.mp.                                                                                                                                                                                                                                                                                                                                                                                                                                                                                                                                                                                                                         |
| 6.  | exp Acquired Immunodeficiency Syndrome/ or AIDS.mp.                                                                                                                                                                                                                                                                                                                                                                                                                                                                                                                                                                                                      |
| 7.  | Or/1-6                                                                                                                                                                                                                                                                                                                                                                                                                                                                                                                                                                                                                                                   |
| 8.  | self?test\$.mp.                                                                                                                                                                                                                                                                                                                                                                                                                                                                                                                                                                                                                                          |
| 9.  | test\$ adj3 and (home* or remote or personal).mp.                                                                                                                                                                                                                                                                                                                                                                                                                                                                                                                                                                                                        |
| 10. | (option\$ adj1 test\$.mp.                                                                                                                                                                                                                                                                                                                                                                                                                                                                                                                                                                                                                                |
| 11. | (alternative adj3 test\$.mp.                                                                                                                                                                                                                                                                                                                                                                                                                                                                                                                                                                                                                             |
| 12. | (dried blood spot adj3 (home* or remote or personal or self*)),ti,ab.                                                                                                                                                                                                                                                                                                                                                                                                                                                                                                                                                                                    |
| 13. | ((home\$ or self\$ or mail\$) adj3 (collection\$ or sampl\$ or test\$ or kit\$)).ti,ab.                                                                                                                                                                                                                                                                                                                                                                                                                                                                                                                                                                  |
| 14. | Or/8-13                                                                                                                                                                                                                                                                                                                                                                                                                                                                                                                                                                                                                                                  |
| 15. | "Referral and Consultation"/                                                                                                                                                                                                                                                                                                                                                                                                                                                                                                                                                                                                                             |
| 16. | Health Services Accessibility/                                                                                                                                                                                                                                                                                                                                                                                                                                                                                                                                                                                                                           |
| 17. | ((continuity or quality or standard or link\$ or cascade) adj3 care)).mp.                                                                                                                                                                                                                                                                                                                                                                                                                                                                                                                                                                                |
| 18. | Or/15-17                                                                                                                                                                                                                                                                                                                                                                                                                                                                                                                                                                                                                                                 |
| 19. | exp clinical trial/ or (trial or randomized or randomised).ti. or randomly.ab. or randomi?ed.ab. or placebo.ab. or controlled clinical trial.pt.                                                                                                                                                                                                                                                                                                                                                                                                                                                                                                         |
| 20. | 7 and 14 and 18 and 19                                                                                                                                                                                                                                                                                                                                                                                                                                                                                                                                                                                                                                   |
| 21. | exp animals/ not humans.sh.                                                                                                                                                                                                                                                                                                                                                                                                                                                                                                                                                                                                                              |
| 22. | 20 not 21                                                                                                                                                                                                                                                                                                                                                                                                                                                                                                                                                                                                                                                |
| 23. | exp case reports/ or Cohort Studies/ or cohort\$.mp. or cross-sectional stud\$.mp. or cross?sectional stud\$.mp. or case-control stud\$.mp. or case control stud\$.mp.                                                                                                                                                                                                                                                                                                                                                                                                                                                                                   |
| 24. | 22 not 23                                                                                                                                                                                                                                                                                                                                                                                                                                                                                                                                                                                                                                                |
| 25. | (exp adolescence/ or exp adolescent/ or exp child/ or exp childhood disease/ or exp infant disease/ or (adolescen* or babies or baby or boy? or boyfriend or boyhood or child or child* or child*3 or children* or girl? or infant* or juvenil* or juvenile* or kid? or minors or minors* or neonat* or neonat* or newborn* or new-born* or paediatric* or peadiatric* or pediatric* or perinat* or preschool* or puber* or pubescen* or school or school child* or school* or schoolchild* or schoolchild* or teen* or toddler? or underage? or under-age? or youth*).ti,ab,kf,hw.) not ((exp child/ or exp infant/ or exp adolescent/) and exp adult/) |
| 26. | 24 not 25                                                                                                                                                                                                                                                                                                                                                                                                                                                                                                                                                                                                                                                |
| 27. | limit 26 to (english language or french language and yr="2010 -Current")                                                                                                                                                                                                                                                                                                                                                                                                                                                                                                                                                                                 |

**Table S3: Search strategy for Global Health Library via OVID SP®**

| SN  | Search terms                                                                                                                                                                                                                                                                                                                                                                                                                                                                                                                                                                                                                                             |
|-----|----------------------------------------------------------------------------------------------------------------------------------------------------------------------------------------------------------------------------------------------------------------------------------------------------------------------------------------------------------------------------------------------------------------------------------------------------------------------------------------------------------------------------------------------------------------------------------------------------------------------------------------------------------|
| 1.  | exp HIV/                                                                                                                                                                                                                                                                                                                                                                                                                                                                                                                                                                                                                                                 |
| 2.  | HIV?1.mp.                                                                                                                                                                                                                                                                                                                                                                                                                                                                                                                                                                                                                                                |
| 3.  | Exp HIV?2.mp.                                                                                                                                                                                                                                                                                                                                                                                                                                                                                                                                                                                                                                            |
| 4.  | exp HIV infection\$/                                                                                                                                                                                                                                                                                                                                                                                                                                                                                                                                                                                                                                     |
| 5.  | human immun?deficiency virus.mp.                                                                                                                                                                                                                                                                                                                                                                                                                                                                                                                                                                                                                         |
| 6.  | exp Acquired Immunodeficiency Syndrome/ or AIDS.mp.                                                                                                                                                                                                                                                                                                                                                                                                                                                                                                                                                                                                      |
| 7.  | Or/1-6                                                                                                                                                                                                                                                                                                                                                                                                                                                                                                                                                                                                                                                   |
| 8.  | self?test\$.mp.                                                                                                                                                                                                                                                                                                                                                                                                                                                                                                                                                                                                                                          |
| 9.  | test\$ adj3 and (home* or remote or personal).mp.                                                                                                                                                                                                                                                                                                                                                                                                                                                                                                                                                                                                        |
| 10. | (option\$ adj1 test\$.mp.                                                                                                                                                                                                                                                                                                                                                                                                                                                                                                                                                                                                                                |
| 11. | (alternative adj3 test\$.mp.                                                                                                                                                                                                                                                                                                                                                                                                                                                                                                                                                                                                                             |
| 12. | (dried blood spot adj3 (home* or remote or personal or self*)),ti,ab.                                                                                                                                                                                                                                                                                                                                                                                                                                                                                                                                                                                    |
| 13. | ((home\$ or self\$ or mail\$) adj3 (collection\$ or sampl\$ or test\$ or kit\$)).ti,ab.                                                                                                                                                                                                                                                                                                                                                                                                                                                                                                                                                                  |
| 14. | Or/8-13                                                                                                                                                                                                                                                                                                                                                                                                                                                                                                                                                                                                                                                  |
| 15. | "Referral and Consultation"/                                                                                                                                                                                                                                                                                                                                                                                                                                                                                                                                                                                                                             |
| 16. | Health Services Accessibility/                                                                                                                                                                                                                                                                                                                                                                                                                                                                                                                                                                                                                           |
| 17. | ((continuity or quality or standard or link\$ or cascade) adj3 care)).mp.                                                                                                                                                                                                                                                                                                                                                                                                                                                                                                                                                                                |
| 18. | Or/15-17                                                                                                                                                                                                                                                                                                                                                                                                                                                                                                                                                                                                                                                 |
| 19. | exp clinical trial/ or (trial or randomized or randomised).ti. or randomly.ab. or randomi?ed.ab. or placebo.ab. or controlled clinical trial.pt.                                                                                                                                                                                                                                                                                                                                                                                                                                                                                                         |
| 20. | 7 and 14 and 18 and 19                                                                                                                                                                                                                                                                                                                                                                                                                                                                                                                                                                                                                                   |
| 21. | exp animals/ not humans.sh.                                                                                                                                                                                                                                                                                                                                                                                                                                                                                                                                                                                                                              |
| 22. | 20 not 21                                                                                                                                                                                                                                                                                                                                                                                                                                                                                                                                                                                                                                                |
| 23. | exp case reports/ or Cohort Studies/ or cohort\$.mp. or cross-sectional stud\$.mp. or cross?sectional stud\$.mp. or case-control stud\$.mp. or case control stud\$.mp.                                                                                                                                                                                                                                                                                                                                                                                                                                                                                   |
| 24. | 22 not 23                                                                                                                                                                                                                                                                                                                                                                                                                                                                                                                                                                                                                                                |
| 25. | (exp adolescence/ or exp adolescent/ or exp child/ or exp childhood disease/ or exp infant disease/ or (adolescen* or babies or baby or boy? or boyfriend or boyhood or child or child* or child*3 or children* or girl? or infant* or juvenil* or juvenile* or kid? or minors or minors* or neonat* or neonat* or newborn* or new-born* or paediatric* or peadiatric* or pediatric* or perinat* or preschool* or puber* or pubescen* or school or school child* or school* or schoolchild* or schoolchild* or teen* or toddler? or underage? or under-age? or youth*).ti,ab,kf,hw.) not ((exp child/ or exp infant/ or exp adolescent/) and exp adult/) |
| 26. | 24 not 25                                                                                                                                                                                                                                                                                                                                                                                                                                                                                                                                                                                                                                                |
| 27. | limit 26 to (english language or french language and yr="2010 -Current")                                                                                                                                                                                                                                                                                                                                                                                                                                                                                                                                                                                 |

**Table S4: Search strategy for PsychInfo via OVID SP®**

| SN  | Search terms                                                                                                                                                                                                                                                                                                                                                                                                                                                                                                                                                                                                                                             |
|-----|----------------------------------------------------------------------------------------------------------------------------------------------------------------------------------------------------------------------------------------------------------------------------------------------------------------------------------------------------------------------------------------------------------------------------------------------------------------------------------------------------------------------------------------------------------------------------------------------------------------------------------------------------------|
| 1.  | exp HIV/                                                                                                                                                                                                                                                                                                                                                                                                                                                                                                                                                                                                                                                 |
| 2.  | HIV?1.mp.                                                                                                                                                                                                                                                                                                                                                                                                                                                                                                                                                                                                                                                |
| 3.  | Exp HIV?2.mp.                                                                                                                                                                                                                                                                                                                                                                                                                                                                                                                                                                                                                                            |
| 4.  | exp HIV infection\$/                                                                                                                                                                                                                                                                                                                                                                                                                                                                                                                                                                                                                                     |
| 5.  | human immun?deficiency virus.mp.                                                                                                                                                                                                                                                                                                                                                                                                                                                                                                                                                                                                                         |
| 6.  | exp Acquired Immunodeficiency Syndrome/ or AIDS.mp.                                                                                                                                                                                                                                                                                                                                                                                                                                                                                                                                                                                                      |
| 7.  | Or/1-6                                                                                                                                                                                                                                                                                                                                                                                                                                                                                                                                                                                                                                                   |
| 8.  | self?test\$.mp.                                                                                                                                                                                                                                                                                                                                                                                                                                                                                                                                                                                                                                          |
| 9.  | test\$ adj3 and (home* or remote or personal).mp.                                                                                                                                                                                                                                                                                                                                                                                                                                                                                                                                                                                                        |
| 10. | (option\$ adj1 test\$.mp.                                                                                                                                                                                                                                                                                                                                                                                                                                                                                                                                                                                                                                |
| 11. | (alternative adj3 test\$.mp.                                                                                                                                                                                                                                                                                                                                                                                                                                                                                                                                                                                                                             |
| 12. | (dried blood spot adj3 (home* or remote or personal or self*)),ti,ab.                                                                                                                                                                                                                                                                                                                                                                                                                                                                                                                                                                                    |
| 13. | ((home\$ or self\$ or mail\$) adj3 (collection\$ or sampl\$ or test\$ or kit\$)).ti,ab.                                                                                                                                                                                                                                                                                                                                                                                                                                                                                                                                                                  |
| 14. | Or/8-13                                                                                                                                                                                                                                                                                                                                                                                                                                                                                                                                                                                                                                                  |
| 15. | "Referral and Consultation"/                                                                                                                                                                                                                                                                                                                                                                                                                                                                                                                                                                                                                             |
| 16. | Health Services Accessibility/                                                                                                                                                                                                                                                                                                                                                                                                                                                                                                                                                                                                                           |
| 17. | ((continuity or quality or standard or link\$ or cascade) adj3 care)).mp.                                                                                                                                                                                                                                                                                                                                                                                                                                                                                                                                                                                |
| 18. | Or/15-17                                                                                                                                                                                                                                                                                                                                                                                                                                                                                                                                                                                                                                                 |
| 19. | exp clinical trial/ or (trial or randomized or randomised).ti. or randomly.ab. or randomi?ed.ab. or placebo.ab. or controlled clinical trial.pt.                                                                                                                                                                                                                                                                                                                                                                                                                                                                                                         |
| 20. | 7 and 14 and 18 and 19                                                                                                                                                                                                                                                                                                                                                                                                                                                                                                                                                                                                                                   |
| 21. | exp animals/ not humans.sh.                                                                                                                                                                                                                                                                                                                                                                                                                                                                                                                                                                                                                              |
| 22. | 20 not 21                                                                                                                                                                                                                                                                                                                                                                                                                                                                                                                                                                                                                                                |
| 23. | exp case reports/ or Cohort Studies/ or cohort\$.mp. or cross-sectional stud\$.mp. or cross?sectional stud\$.mp. or case-control stud\$.mp. or case control stud\$.mp.                                                                                                                                                                                                                                                                                                                                                                                                                                                                                   |
| 24. | 22 not 23                                                                                                                                                                                                                                                                                                                                                                                                                                                                                                                                                                                                                                                |
| 25. | (exp adolescence/ or exp adolescent/ or exp child/ or exp childhood disease/ or exp infant disease/ or (adolescen* or babies or baby or boy? or boyfriend or boyhood or child or child* or child*3 or children* or girl? or infant* or juvenil* or juvenile* or kid? or minors or minors* or neonat* or neonat* or newborn* or new-born* or paediatric* or peadiatric* or pediatric* or perinat* or preschool* or puber* or pubescen* or school or school child* or school* or schoolchild* or schoolchild* or teen* or toddler? or underage? or under-age? or youth*).ti,ab,kf,hw.) not ((exp child/ or exp infant/ or exp adolescent/) and exp adult/) |
| 26. | 24 not 25                                                                                                                                                                                                                                                                                                                                                                                                                                                                                                                                                                                                                                                |
| 27. | limit 26 to (english language or french language and yr="2010 -Current")                                                                                                                                                                                                                                                                                                                                                                                                                                                                                                                                                                                 |

**Table S5: Search strategy for ClinicalTrial.gov**

| SN | Search terms                                                                          |
|----|---------------------------------------------------------------------------------------|
| 1. | Hiv or "human immunodeficiency virus" OR "Acquired Immunodeficiency Syndrome" OR AIDS |
| 2. | "self test " OR "self-test" OR "home test" OR "remote test" OR "personal test"        |

**Table S6: Search strategy for Current Controlled Trials**

| SN | Search terms                                                                          |
|----|---------------------------------------------------------------------------------------|
| 1. | Hiv or "human immunodeficiency virus" OR "Acquired Immunodeficiency Syndrome" OR AIDS |
| 2. | "self test " OR "self-test" OR "home test" OR "remote test" OR "personal test"        |

**Table S7: Search strategy for Cochrane Library**

| SN  | Search terms                                                                                                                        |
|-----|-------------------------------------------------------------------------------------------------------------------------------------|
| 1.  | HIV:tw                                                                                                                              |
| 2.  | ("human immunodeficiency virus* " OR "human immuno deficiency virus* " OR "human immuno-deficiency virus* "):tw                     |
| 3.  | ("acquired immune deficiency syndrome" OR "acquired immune-deficiency syndrome" OR "acquired immunodeficiency syndrome" OR AIDS):tw |
| 4.  | #1 OR #2 OR #3                                                                                                                      |
| 5.  | (self?test*):tw                                                                                                                     |
| 6.  | (test* and (home* or remote or personal)):tw                                                                                        |
| 7.  | (option* AND test*):tw                                                                                                              |
| 8.  | (alternative AND test*):tw                                                                                                          |
| 9.  | (dried blood spot AND (home* or remote or personal or self*)):ti,ab,kw                                                              |
| 10. | ((home* or self* or mail*) AND (collection* or sampl* or test* or kit*)):ti,ab,kw                                                   |
| 11. | #5 OR #6 OR #7 OR #8 OR #9 OR #10                                                                                                   |
| 12. | ("Referral and Consultation"):tw                                                                                                    |
| 13. | (Health Services Accessibility):tw                                                                                                  |
| 14. | ((continuity or quality or standard or link* or cascade) AND care):tw                                                               |
| 15. | #12 OR #13 OR #14                                                                                                                   |
| 16. | (trial):pt                                                                                                                          |
| 17. | #4 AND #11 AND #15 AND #16                                                                                                          |
| 18. | Limit: Cochrane Library publication date from Jan 2010 to present                                                                   |

**Table S8: Search strategy for Web of Science**

| SN  | Search terms                                                                                                                        |
|-----|-------------------------------------------------------------------------------------------------------------------------------------|
| 1.  | TS=(HIV)                                                                                                                            |
| 2.  | TS=("human immunodeficiency virus* " OR "human immuno deficiency virus* " OR "human immuno-deficiency virus* ")                     |
| 3.  | TS=("acquired immune deficiency syndrome" OR "acquired immune-deficiency syndrome" OR "acquired immunodeficiency syndrome" OR AIDS) |
| 4.  | #1 OR #2 OR #3                                                                                                                      |
| 5.  | TS=(self-test* OR self test*)                                                                                                       |
| 6.  | TS=(test* and (home* or remote or personal))                                                                                        |
| 7.  | TS=(option* AND test*)                                                                                                              |
| 8.  | TS=(alternative AND test*)                                                                                                          |
| 9.  | TS=(dried blood spot AND (home* or remote or personal or self*))                                                                    |
| 10. | TS=((home* or self* or mail*) AND (collection* or sampl* or test* or kit*))                                                         |
| 11. | #5 OR #6 OR #7 OR #8 OR #9 OR #10                                                                                                   |
| 12. | TS=("Referral and Consultation")                                                                                                    |
| 13. | TS=(Health Services Accessibility)                                                                                                  |
| 14. | TS=((continuity or quality or standard or link* or cascade) AND care)                                                               |
| 15. | #12 OR #13 OR #14                                                                                                                   |
| 16. | TS=(trial)                                                                                                                          |
| 17. | #4 AND #11 AND #15 AND #16                                                                                                          |
| 18. | Limit: publication date from Jan 2010 to present                                                                                    |
